# Supplementary material
Source: MDPI journal article supplement (https://www.mdpi.com/1999-4907/14/9/1710)
Supplement: s1 [file s1]

**Table S1.** The mean development time (days) of *Ramulus mikado* eggs observed in a combined treatment of low or high temperature followed by an operative temperature.

The experiments were conducted under a 16 L:8D photoperiod condition.

| Experimental regime          | Exposure time (days) at each temperature |      |           |                      |                   | Cumulative degree-days (DD) | Reference  |
|------------------------------|------------------------------------------|------|-----------|----------------------|-------------------|-----------------------------|------------|
|                              | < LDT (6.1 °C)                           |      | Operative |                      | UDT (29.2 °C) <   |                             |            |
|                              | 5 °C                                     | 6 °C | 10 °C     | 15 °C                | 25 °C             | 30 °C                       |            |
| Exposure to low temperature  | 30.0                                     |      |           |                      | 89.7              | 1695.3                      | [12]       |
|                              | 60.0                                     |      |           |                      | 91.5              | 1729.4                      | [12]       |
|                              | 90.0                                     |      |           |                      | 89.1              | 1684.0                      | [12]       |
|                              |                                          | 20.0 |           |                      | 89.8              | 1697.2                      | This study |
|                              |                                          | 40.0 |           |                      | 90.4              | 1708.6                      | This study |
|                              |                                          |      | 30.0      |                      | 83.2              | 1689.5                      | [12]       |
|                              |                                          |      | 30.0      |                      | 85.7              | 1736.7                      | [12]       |
|                              |                                          |      | 60.0      |                      | 60.3              | 1373.7                      | [12]       |
|                              |                                          |      | 60.0      |                      | 76.5              | 1679.9                      | [12]       |
|                              |                                          |      | 90.0      |                      | 50.7              | 1309.2                      | [12]       |
| Constant mild temperature    |                                          |      |           |                      | 100.9             | 1907.0                      | [3]        |
|                              |                                          |      |           |                      | 117.0             | 2211.3                      | [12]       |
|                              |                                          |      |           |                      | 88.8              | 1677.4                      | This study |
|                              |                                          |      |           |                      | 90.5 <sup>c</sup> | 1710.5                      | [9]        |
|                              |                                          |      |           | 204.5 <sup>a</sup>   |                   | 1901.9                      | [9]        |
| Exposure to high temperature |                                          |      |           | 121-126 <sup>b</sup> |                   | 1076.9-1121.4               | [13]       |
|                              |                                          |      |           | 109-120 <sup>b</sup> |                   | 970.1-1068                  | [13]       |

<sup>a</sup>The experiment was conducted at 15.4 °C. <sup>b</sup>Minimum-maximum development time. <sup>c</sup>The experiment was conducted at 24.9 °C.
